# Supplementary material for: Proteolytic Activity of Bacillus subtilis upon κ-Casein Undermines Its “Caries-Safe” Effect
Source: PubMed Central journal article supplement (PMC7074799; doi:10.3390/microorganisms8020221), 2020-02-06
Supplement: microorganisms-08-00221-s001.pdf [file microorganisms-08-00221-s001.pdf]

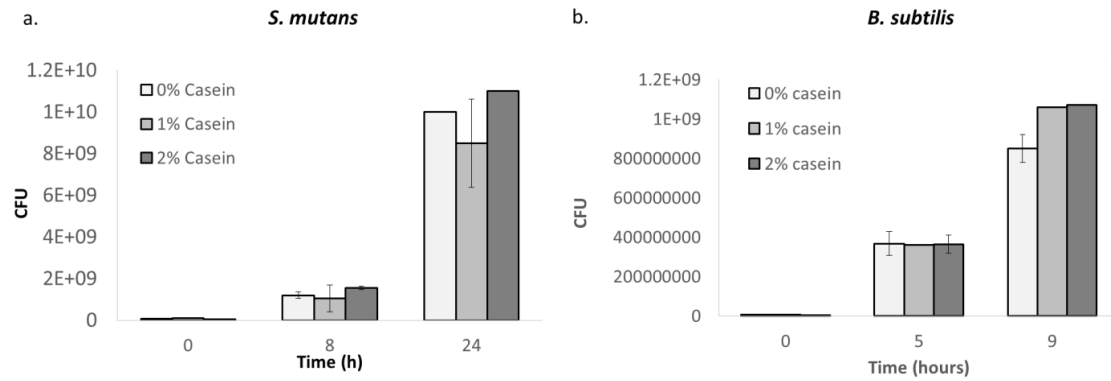

**Figure S1.** Growth curve analysis in the presence of milk caseins. (a) *S. mutans* cells were grown in BHI supplemented with various concentrations of the casein proteins mixture (0, 1 or 2%) and incubated at 37 °C in 95% air/5% CO<sub>2</sub>. At each time point, a sample was taken, and CFU quantification was conducted. (b) *B. subtilis* cells were grown in LB supplemented with various concentrations of the casein proteins (0, 1, or 2%) and incubated at 37 °C, 150 rpm. At each time point, a sample was taken, and CFU quantitation was conducted. The data display a mean of 2 biological repeats, each performed in triplicate.
